# Supplementary material for: Chromosome Level Genome Assembly of Andrographis paniculata
Source: Front Genet. 2020 Jun 30;11:701. doi: 10.3389/fgene.2020.00701 (PMC7340177; doi:10.3389/fgene.2020.00701)
Supplement: Supplementary file 1 [file Table_1.xlsx]

## Sheet: Table S1
	Supplementary Table 1: The library information and data statistics for the A. paniculata assembly
	Platform	Number of libraries	Size	Average Read Length (bp)	Number of Bases (Gb)	Sequence Depth*	Application
	PacBio	11	Library Mean Size	4,134 – 8,805	53.9	182.7 ´	Genome assembly
		r54040_20180416_075652	20 Kb	8805	1.31
		r54040_20180430_081214	20 Kb	7570	8.04
		r54040_20180430_081214	20 Kb	7572	8.2
		r54160_20180422_050737	20 Kb	5476	4.89
		r54254_20180419_080053	20 Kb	4134	3.99
		r54263_20180428_092012	20 Kb	6743	6.13
		r54268_20180423_085506	20 Kb	4279	4.18
		r54268_20180425_094946	20 Kb	8363	0.92
		r54269_20180503_064907	20 Kb	6723	5.44
		r54272_20180420_043223	20 Kb	4873	5.31
		r54269_20180503_064908	20 Kb	6710	5.59
	Illumina	4	Insert size	150 × 2	238.6	808.8 ´	Genome survey and error correction
		library-241	241 bp	150 × 2	58.2
		library-313	313 bp	150 × 2	61
		library-424	424 bp	150 × 2	63.8
		library-533	533 bp	150 × 2	55.6
	Total	15	-	-	292.5	991.5 ´
	* Determined by an estimated genome size of 295 Mb.

## Sheet: Table S2
	Supplementary Table 2: Evaluation of the completeness of the genome assembly by BUSCO
		BUSCO Values	This Study (%)	CANU v1.5 * (%)
		Complete	91	83.6
		Single	86	79.6
		Duplicate	5	4
		Fragmented	3	5
		Missing	6	11.4
		* This assembly from Sun et al. 2019.

## Sheet: Table S3
	Supplementary Table 3: Summary statistics for 24 pseudomolecules.
	Pseudomolecule	Length(bp)
	Chr1	23853326
	Chr2	13441967
	Chr3	12331133
	Chr4	12055403
	Chr5	11949586
	Chr6	11938995
	Chr7	10544145
	Chr8	10457448
	Chr9	10282441
	Chr10	9994296
	Chr11	9991270
	Chr12	9764608
	Chr13	9410038
	Chr14	9237961
	Chr15	9065050
	Chr16	8968182
	Chr17	8691415
	Chr18	8646728
	Chr19	8162705
	Chr20	7899855
	Chr21	7783421
	Chr22	7669114
	Chr23	7486787
	Chr24	7230000
	Total anchored	246855874

## Sheet: Table S4
	Supplementary Table 4: Transposable element prediction in the A. paniculata genome.
	Type	Repeat Size (bp)	% of genome
	Tandem Repeat Finder	21001389	7.38684
	Repeatmasker	20473147	7.20104
	Proteinmask	37522530	13.1978
	De novo	159260245	56.0168
	Total	163060163	57.3533

## Sheet: Table S5
	Supplementary Table 5: Summary of transposable elements in the A. paniculata genome.
	Type	Repbase TEs Length (Bp)	% in genome	TE protiens Length (Bp)	% in genome	Denovo Length (Bp)	% in genome	Combined TEs Length (Bp)	% in genome
	DNA	1823698	0.641451	3689505	1.29771	19182726	6.74716	20447715	7.1921
	LINE	258768	0.091017	1606599	0.565091	4478759	1.57532	4898322	1.72289
	SINE	15133	0.005323	0	0	579578	0.203856	590668	0.207756
	LTR	18443560	6.48717	32309824	11.3644	78123078	27.4783	81076205	28.517
	Other	203	7.1e-05	0	0	0	0	203	7.1e-05
	Unknown	0	0	0	0	62119610	21.8494	62119610	21.8494
	Total	20473147	7.20104	37522530	13.1978	153812654	54.1007	155200106	54.5887

## Sheet: Table S6
	Supplementary Table 6: The protein-coding gene annotation of the A. paniculata assembly
	Methods		Gene Number	Average mRNA Lengths (bp)	Total Exon Number	Average Exon Length (bp)	Average CDS Lengths (bp)	Average Exon Number	Total Intron Lengths (bp)
	Ab initio	Augustus	22584	3448.46	136009	225.586	1358.56	6.02236	47198366
		GlimmerHMM	26954	2243.1	117735	236.432	1032.73	4.368	32624365
		Genscan	21172	7130.74	130828	224.294	1385.98	6.17929	121628032
		Snap	35125	1323.76	120707	218.583	751.161	3.4365	20112379
	Homology	Arabidopsis thaliana	21112	2586.2	107732	215.478	1099.56	5.10288	31386034
		Sesamum indicum	22337	2863.24	120420	223.305	1203.85	5.39106	37065855
		Solanum lycopersicum	21466	2754.44	113349	219.467	1158.88	5.2804	34250461
		Vitis vinifera	21509	2748.06	112777	219.222	1149.43	5.24325	34384839
	RNA-Seq		10081	5575.72	73089	247.239	1792.52	7.25017	22287307
	EVM		24015	3175.49	136156	227.143	1287.82	5.66962	45332338

## Sheet: Table S7
	Supplementary Table 7: Ortholog clustering analysis of the A. paniculata genome.
	Species	Total Number of genes	Single-copy orthologs	Mulitiple-copy orthologs	Unique paralogs	Other orthologs	Unclustered genes
	C. roseus	26511	5346	4257	6843	6684	3381
	S. miltiorrhiza	27656	3811	10073	3474	6089	4209
	H. annuus	52243	3085	14364	8549	13496	12749
	A. paniculata	24015	4436	7165	1234	6731	4449
	A. thaliana	26950	4246	7870	3321	7831	3682
	S. indicum	23975	3935	8395	451	9591	1603
	S. lycopersicum	25470	4342	7696	1420	9701	2311
	O. sativa	42142	4367	7897	10974	6867	12037

## Sheet: Table S8
	Supplementary Table 8: Functional annotation of the A. paniculata protein-coding genes.
		Number	Percent(%)
	InterPro	19444	80.9661
	GO	14933	62.182
	KEGG	18540	77.2017
	Swissprot	18544	77.2184
	TrEMBL	21974	91.5011
	Annotated	22175	92.3381
	Unanotated	1840	7.66188

## Sheet: Table S9
	Supplementary Table 9: Summary of RNAs in the A. paniculata genome.
	Type		Copy Num	Average Lengths (bp)	Total Lengths (bp)	% of genome
	miRNA		93	135.215	12575	0.004423
	tRNA		524	75.1431	39375	0.013849
	rRNA	total	5785	97.1416	561964	0.19766
		18S	5175	97.3337	503702	0.177168
		28S	126	134.492	16946	0.00596
		5.8S	34	141.059	4796	0.001687
		5S	450	81.1556	36520	0.012845
	snRNA	total	189	127.905	24174	0.008503
		CD-box	84	100.762	8464	0.002977
		HACA-box	13	127.308	1655	0.000582
		splicing	92	152.772	14055	0.004944

## Sheet: Table S10
	Supplementary Table 10: Summary of predicted A. paniculata genes involved in the terpenoid backbone biosynthesis
	A. thaliana Gene ID	Gene Name/Description	A. paniculata Gene ID	Leaf_FPKM	Root_FPKM
	AT4G11820.1	MVA1	evm.model.4.25	28.2014	115.82
			evm.model.4.503	27.8545	21.7199
	AT1G76490.1/AT2G17370.1	HMG1/2	evm.model.17.474	59.7734	106.395
			evm.model.16.142	19.3296	16.5263
			evm.model.26.17	8.49103	13.2915
			evm.model.13.150	93.4156	359.622
			evm.model.36.163	37.0193	88.7814
			evm.model.40.163	3.26081	0.914265
			evm.model.57.65	1.08893	1.05959
	AT5G27450.1	MK	evm.model.2.432	30.9415	44.3874
	AT2G38700.1	MVD1	evm.model.42.32	31.9005	83.9848
	AT4G36810.1	GGPPS2	evm.model.7.233	0.0457965	1.07083
			evm.model.7.239	1.58901	2.82535
			evm.model.7.234	0.208229	6.28908
			evm.model.7.232	0.030562	0.446622
			evm.model.11.63	5.84873	3.71923
			evm.model.10.392	0	0
			evm.model.10.389	0	0
			evm.model.10.388	0.0753379	0.018917
			evm.model.10.387	136.457	1.56937
			evm.model.10.391	0	0.140398
			evm.model.26.415	40.2706	14.3507
			evm.model.2.377	101.668	23.3426
			evm.model.2.376	250.464	48.5051
	AT5G47770.1	FPS1	evm.model.3.641	0.0676714	0.201724
			evm.model.3.642	25.1652	16.6092
			evm.model.4.498	68.9114	114.002
			evm.model.49.391	1.57668	1.62985
	AT5G11380.1	DXPS2	evm.model.60.1	127.693	5.53856
			evm.model.53.231	7.80348	9.383
			evm.model.14.160	11.0444	3.95293
			evm.model.12.99	265.445	26.7415
			evm.model.7.43	15.7672	15.4902
	AT5G62790.1	DXR	evm.model.37.135	187.976	8.97277
			evm.model.59.86	167.557	35.1904
	AT2G02500.1	ISPD	evm.model.13.412	68.6826	4.31532
	AT1G63970.1	ISPF	evm.model.53.338	403.07	34.3101
	AT5G16440.1/AT3G02780.1	IPP1/2	evm.model.25.57	96.0844	110.301
			evm.model.42.164	2.60573	17.8825
	AT4G34350.1	HDR	evm.model.11.181	1487.48	100.662
			evm.model.16.320	281.064	3.47052

[truncated: 2 more sheets: Table S11, Table S12]
